# Supplementary material
Source: Springer Nature journal article supplement (https://www.springermedizin.de/resource/supplementary/12889_2013_6464_MOESM4_ESM.pdf/9498186)

**Figure 4:** Sample of COMPASS built environment data linkage for 500m buffers examining land use and street network connectivity surrounding two schools

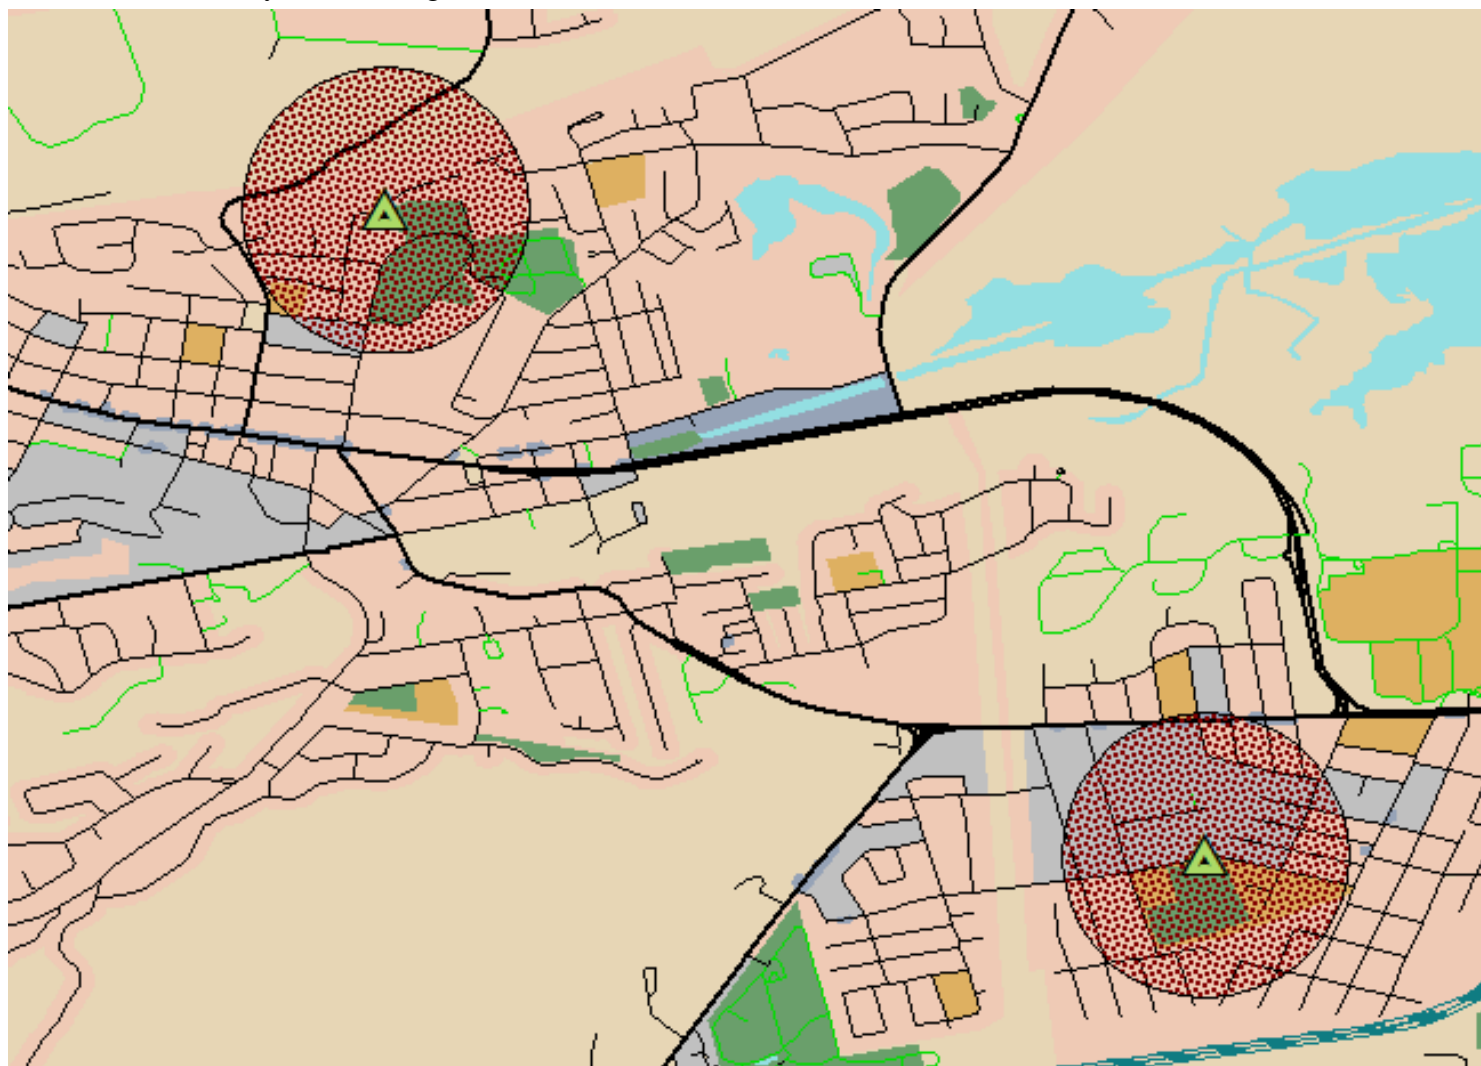

Supplement: MOESM4 [file 9498186]
